# Supplementary material for: Trading with Pariahs: North Korean Sanctions and the Challenge of Weaponized Interdependence
Source: Oxford University Press journal article supplement (doi:10.1093/isagsq/ksae031), 2024-04-01
Supplement: ksae031_supplemental_files.zip [file ksae031_supplemental_files.zip]

## Appendix 1: Tables of Strength Centrality Measures

The tables below contain the two strength centrality measures across five critical junctures. MOSC1 is trade partner's annual total share of DPRK trade expressed as a percentage ranging from 0-100. MOSC2 is the DPRK's share of a given trading partner's annual trade expressed as a percentage ranging from 0-100.

|                          | <b>Measure of Strength Centrality (MOSC1)</b> |        |        |         |        |
|--------------------------|-----------------------------------------------|--------|--------|---------|--------|
|                          | Trade partner's total share of DPRK trade     |        |        |         |        |
|                          | 1990                                          | 1995   | 2003   | 2007    | 2017   |
| Albania                  |                                               |        | 0.0097 | 0.0024  | 0.0007 |
| Algeria                  | 0.0145                                        | 0.1139 | 0.1216 | 0.2460  | 0.0212 |
| Andorra                  |                                               | 0.0026 | 0.0025 | 0.0000  |        |
| Angola                   |                                               |        |        | 13.2495 |        |
| Antigua and Barbuda      |                                               |        |        | 0.0009  | 0.0021 |
| Argentina                | 0.0038                                        |        |        |         |        |
| Armenia                  |                                               |        | 0.0017 | 0.0006  | 0.0096 |
| Australia                | 1.6367                                        | 0.0323 | 0.1988 | 0.0990  |        |
| Austria                  | 1.3648                                        |        | 0.0998 | 0.0681  | 0.0188 |
| Azerbaijan               |                                               |        | 0.0173 |         | 0.0009 |
| Bahrain                  | 0.0004                                        |        |        | 0.0004  |        |
| Bangladesh               | 0.0290                                        | 0.0262 | 0.2051 | 0.0167  |        |
| Barbados                 |                                               |        | 0.0013 | 0.0084  | 0.0118 |
| Belarus                  |                                               |        | 0.0756 | 0.0516  | 0.0039 |
| Belgium                  | 0.8739                                        | 0.8893 | 0.4881 | 0.0467  | 0.0032 |
| Belize                   |                                               |        | 0.0022 | 0.0012  | 0.0001 |
| Benin                    |                                               |        | 0.0164 | 0.0783  | 0.0013 |
| Bhutan                   |                                               |        |        | 0.0000  |        |
| Bolivia                  | 0.0437                                        | 0.0124 | 0.0306 | 0.0074  | 0.0193 |
| Bosnia and Herzegovina   |                                               |        | 0.0302 | 0.0104  | 0.0011 |
| Botswana                 |                                               |        |        |         | 0.0001 |
| Brazil                   | 0.0008                                        | 1.9987 | 4.1840 | 3.0076  | 0.0900 |
| Brunei                   |                                               |        | 0.0022 | 0.0002  | 0.0214 |
| Bulgaria                 |                                               |        | 0.1154 | 0.1427  | 0.0123 |
| Burkina Faso             |                                               | 0.0028 | 0.0006 | 0.0829  | 0.1359 |
| Burundi                  |                                               |        |        | 0.0004  | 0.0026 |
| Cambodia                 |                                               |        | 0.0738 | 0.0027  |        |
| Cameroon                 | 0.0114                                        | 0.0036 | 0.0045 | 0.0003  | 0.0041 |
| Canada                   | 0.0328                                        | 0.0568 | 0.6619 | 0.2521  | 0.0050 |
| Cape Verde               |                                               |        | 0.0018 | 0.0005  | 0.0025 |
| Central African Republic |                                               | 0.0194 | 0.0000 | 0.0004  | 0.0006 |
| Chad                     |                                               | 0.0027 |        |         |        |
| Chile                    | 0.0018                                        | 0.1977 | 0.2257 | 0.3984  |        |

|                |         |         |         |         |         |
|----------------|---------|---------|---------|---------|---------|
| China          | 29.0729 | 21.6108 | 31.4842 | 26.2230 | 93.0654 |
| Colombia       | 0.0304  | 0.1581  | 0.5500  | 0.1240  | 0.0242  |
| Comoros        |         |         | 0.0004  |         |         |
| Congo          |         |         |         | 2.8424  | 0.0023  |
| Costa Rica     | 0.0186  | 0.1078  | 0.0584  | 0.0407  | 0.0276  |
| Cote d'Ivoire  |         | 0.0049  | 0.0362  | 0.0059  | 0.0022  |
| Croatia        |         | 0.0128  | 0.0314  | 0.0061  |         |
| Cuba           |         |         | 0.3096  |         |         |
| Cyprus         | 0.1331  | 0.0200  | 0.0003  | 0.0019  | 0.0117  |
| Czech Republic |         | 0.1651  | 0.0895  | 0.0623  | 0.0144  |
| Denmark        | 0.1478  | 0.0872  | 0.4426  | 0.0977  | 0.0041  |
| Djibouti       | 0.0202  |         |         |         |         |
| Dominica       | 0.0002  |         | 0.0006  | 0.0000  |         |
| Ecuador        |         |         | 0.0070  | 0.0023  | 0.0440  |
| Egypt          | 0.3242  | 0.0753  | 0.4307  | 0.0036  |         |
| El Salvador    | 0.0004  |         | 0.1443  | 0.0782  | 0.0086  |
| Eritrea        |         |         | 0.0008  |         |         |
| Estonia        |         | 0.0100  | 0.0070  | 0.0080  | 0.0067  |
| Ethiopia       | 0.2112  | 0.2604  | 0.0443  | 0.1433  |         |
| Fiji           | 0.0104  |         | 0.0048  | 0.0040  | 0.0429  |
| Finland        | 0.2015  | 0.0036  | 0.0510  | 0.0307  |         |
| France         | 1.4979  | 1.3278  | 0.3606  | 0.2002  | 0.0206  |
| Gabon          |         |         | 0.0206  | 0.0374  |         |
| Gambia         |         |         |         |         | 0.0002  |
| Georgia        |         |         | 0.0023  | 0.0170  |         |
| Germany        | 7.7396  | 3.1920  | 2.8119  | 0.6848  | 0.1165  |
| Ghana          |         |         | 0.1283  | 0.0025  | 0.2071  |
| Greece         | 0.0802  | 0.1682  | 0.0225  | 0.0114  | 0.0009  |
| Grenada        | 0.0005  | 0.0006  | 0.0002  |         |         |
| Guatemala      | 0.0174  | 0.0330  |         | 0.0125  | 0.0039  |
| Guinea         |         | 0.0191  |         | 0.0050  |         |
| Guyana         |         |         | 0.0029  | 0.0004  | 0.0078  |
| Honduras       | 0.0264  | 1.0243  | 0.3798  | 0.2327  | 0.2052  |
| Hungary        | 1.1836  | 0.0212  | 0.0569  | 0.0343  |         |
| Iceland        |         | 0.0013  |         |         |         |
| India          | 2.8404  | 2.5676  | 3.9814  | 10.5845 | 1.7401  |
| Indonesia      | 5.0309  | 1.2325  | 0.0732  | 0.0394  | 0.0404  |
| Ireland        | 0.0468  | 0.5918  | 0.1860  | 0.0410  |         |
| Israel         |         |         | 0.0008  | 0.0003  |         |
| Italy          | 1.5257  | 1.2084  | 0.9581  | 0.1353  | 0.0078  |
| Jamaica        | 0.0602  |         | 0.0222  | 0.0418  |         |
| Japan          | 27.7383 | 22.7298 | 8.0213  | 0.1209  | 0.0000  |
| Jordan         | 0.0056  | 0.0024  | 0.0153  |         |         |
| Kazakhstan     |         | 0.0388  |         | 0.0204  | 0.0102  |
| Kenya          | 0.0011  |         | 0.0655  | 0.0279  | 0.0022  |

|                       |        |        |        |        |        |
|-----------------------|--------|--------|--------|--------|--------|
| Kuwait                |        |        |        | 0.0002 | 0.0044 |
| Kyrgyz Republic       |        | 0.0494 | 0.0100 | 0.0006 | 0.0000 |
| Latvia                |        | 0.1018 | 0.0002 |        |        |
| Lebanon               |        |        | 0.1137 | 0.0580 | 0.0162 |
| Libya                 | 0.0374 |        |        |        |        |
| Lithuania             |        | 0.0046 | 0.0174 | 0.0013 | 0.0229 |
| Luxembourg            |        |        | 0.0189 | 0.0011 | 0.0347 |
| Macedonia             |        |        | 0.0016 | 0.0206 | 0.0099 |
| Madagascar            | 0.1337 | 0.0022 | 0.0035 | 0.0064 | 0.0312 |
| Malawi                |        |        | 0.0001 | 0.0015 | 0.0051 |
| Malaysia              | 0.5660 | 0.0516 | 0.2182 | 0.1154 | 0.1300 |
| Maldives              |        | 0.0032 |        |        |        |
| Mali                  | 0.0187 |        | 0.0069 | 0.0048 | 0.1772 |
| Mauritania            |        |        | 0.0026 | 0.0031 | 0.0105 |
| Mauritius             | 0.1273 | 0.0665 | 0.0309 | 0.0254 | 0.0004 |
| Mexico                | 2.0302 | 7.7035 | 0.9257 | 0.6007 | 0.1175 |
| Moldova               |        | 0.0001 | 0.0008 | 0.0038 | 0.0006 |
| Mongolia              |        |        | 0.0049 | 0.0032 | 0.0061 |
| Montenegro            |        |        |        | 0.0060 | 0.0097 |
| Morocco               |        |        |        |        | 0.0020 |
| Mozambique            |        |        | 0.0015 | 0.0033 | 0.0844 |
| Myanmar               |        |        |        |        | 0.0053 |
| Namibia               |        |        | 0.0371 |        | 0.0000 |
| Nepal                 | 0.0096 |        | 0.0717 |        |        |
| Netherlands           | 0.3395 | 1.5060 | 0.4706 | 0.7043 | 0.0176 |
| New Zealand           | 0.0201 | 0.0006 |        |        |        |
| Nicaragua             | 0.1152 | 0.0070 | 0.1454 | 0.0627 | 0.0328 |
| Niger                 |        | 0.0023 | 0.0064 | 0.0825 |        |
| Nigeria               |        |        | 0.5459 | 0.6856 | 0.0862 |
| Norway                | 0.2239 | 0.0003 |        | 0.3443 | 0.0001 |
| Oman                  | 0.0002 |        |        |        |        |
| Pakistan              | 0.0229 |        | 0.0441 | 0.2476 | 0.5186 |
| Palau                 |        |        |        | 0.0007 |        |
| Papua New Guinea      | 0.0199 |        | 0.3929 |        |        |
| Paraguay              | 0.0593 |        | 0.1093 | 0.2761 |        |
| Peru                  | 0.1400 | 0.1061 | 0.1005 | 0.2259 | 0.1859 |
| Philippines           | 0.4891 |        | 0.0111 | 0.0000 | 0.0227 |
| Poland                | 0.8863 | 1.3210 | 0.2110 | 0.1908 | 0.0365 |
| Portugal              | 0.0032 | 0.0085 | 0.0037 | 0.0027 | 0.0026 |
| Qatar                 |        |        |        | 0.0680 |        |
| Romania               | 1.0698 | 0.0079 | 0.2251 | 0.0092 | 0.0007 |
| Russia                |        |        | 3.4980 | 1.8222 | 1.4535 |
| Rwanda                |        |        |        | 0.0006 |        |
| Saint Kitts and Nevis |        | 0.0072 | 0.0012 | 0.0018 |        |
| Saint Lucia           | 0.0187 | 0.0215 |        | 0.0000 | 0.0039 |

|                                  |               |                |                |                |               |
|----------------------------------|---------------|----------------|----------------|----------------|---------------|
| Saint Vincent and the Grenadines |               |                | 0.0008         | 0.0010         |               |
| Samoa                            |               |                | 0.0065         | 0.0156         | 0.0234        |
| Sao Tome and Principe            |               |                | 0.0001         |                | 0.0030        |
| Saudi Arabia                     | 0.1685        | 1.4889         | 0.1927         | 0.4585         |               |
| Senegal                          | 0.0221        |                | 0.0091         | 0.0202         | 0.0496        |
| Seychelles                       | 0.0003        | 0.0004         | 0.0004         | 0.0472         | 0.0278        |
| Sierra Leone                     |               |                |                |                | 0.0012        |
| Singapore                        | 2.5914        | 1.8375         | 1.8804         | 0.8376         | 0.0094        |
| Slovak Republic                  |               | 0.0291         | 0.0514         | 0.0151         | 0.0164        |
| Slovenia                         |               | 0.0051         | 0.1356         | 0.1052         | 0.0019        |
| Solomon Islands                  |               |                |                |                | 0.0039        |
| South Africa                     |               | 0.0718         | 0.2210         | 1.8605         | 0.0413        |
| <b>South Korea</b>               | <b>0.8110</b> | <b>20.4291</b> | <b>22.2870</b> | <b>23.8555</b> | <b>0.0187</b> |
| Spain                            | 1.2002        | 0.1498         | 0.5944         | 0.0960         | 0.0449        |
| Sri Lanka                        | 0.0167        |                | 0.0028         | 0.0055         | 0.2127        |
| Sudan                            |               | 0.0992         | 0.0054         | 0.0002         | 0.0006        |
| Suriname                         | 0.0029        | 0.0471         | 0.0659         | 0.0646         | 0.0777        |
| Sweden                           | 0.8087        | 1.0282         | 0.1995         | 0.0159         | 0.0015        |
| Switzerland                      | 0.2360        | 0.2185         | 0.2076         | 0.0433         | 0.1003        |
| Syria                            | 0.0022        |                | 0.0427         | 0.7650         |               |
| Taiwan                           |               |                | 0.5019         | 0.3283         | 0.0498        |
| Tanzania                         |               | 0.0057         | 0.0132         | 0.0188         | 0.0535        |
| Thailand                         | 2.3114        | 1.6232         | 7.7705         | 2.8696         |               |
| Timor                            |               |                |                |                | 0.0001        |
| Togo                             | 0.0232        | 0.0112         | 0.0593         | 0.0001         | 0.0312        |
| Tonga                            | 0.0006        |                |                |                |               |
| Trinidad and Tobago              | 0.0112        | 0.0280         | 0.0640         | 0.0828         |               |
| Tunisia                          | 0.1265        | 0.0518         | 0.0298         | 0.0163         | 0.0549        |
| Turkey                           | 1.5985        | 0.2095         | 0.1174         | 0.0321         | 0.0335        |
| Uganda                           |               | 0.0447         | 0.0028         | 0.0126         | 0.0161        |
| Ukraine                          |               |                | 0.1806         | 0.0949         | 0.0553        |
| United Arab Emirates             | 0.0456        |                | 0.0026         | 0.0006         | 0.0023        |
| United Kingdom                   | 0.5489        | 1.2266         | 0.4945         | 0.1964         | 0.0068        |
| <b>United States</b>             | <b>0.0019</b> | <b>0.1969</b>  | <b>0.2473</b>  | <b>0.0229</b>  | <b>0.0000</b> |
| Uruguay                          | 0.0183        | 0.0285         | 0.0076         | 0.0091         | 0.0025        |
| Venezuela                        | 0.0009        | 0.0013         | 0.0002         | 2.6736         |               |
| Vietnam                          |               |                |                | 0.0837         |               |
| Yemen                            |               |                |                | 0.0207         |               |
| Yugoslavia                       | 1.0674        |                |                | 0.0240         | 0.0064        |
| Zambia                           |               | 0.0198         | 0.0004         | 0.0018         | 0.0290        |
| Zimbabwe                         | 0.0752        | 0.1433         |                | 0.0240         | 0.0096        |

## Appendix 2: Commodity Trade Share

Figures 2a-2i show the trade share between North Korea and various trade partners across three commodities: automobiles, anthracite coal, and fish/crustaceans. The data on automobiles reflects the trade share of *imports only*. Anthracite coal and fish/crustaceans reflect total trade share (both imports and exports). Data compiled using UN Comtrade data retrieval tool on the UN Comtrade website:

<https://comtrade.un.org>.

### Cars (7810):

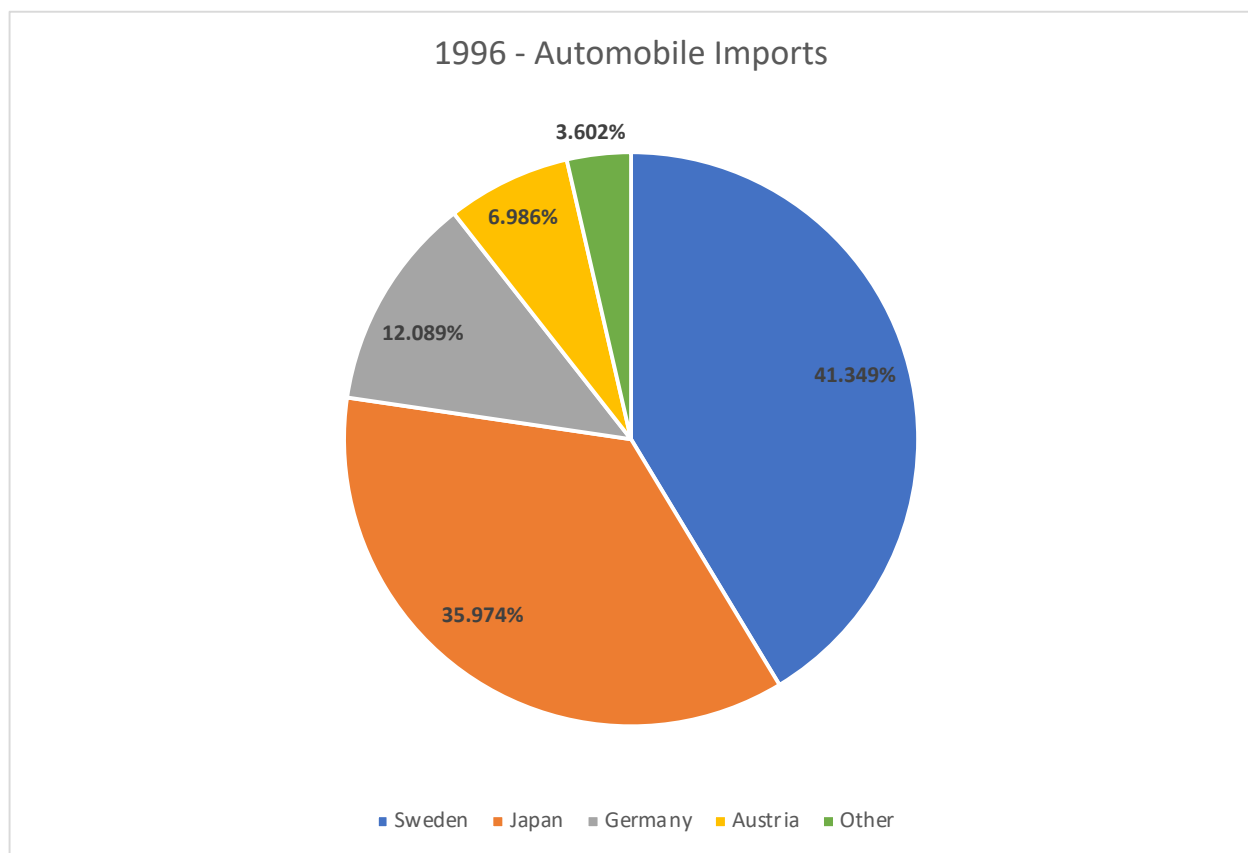

Figure 2a.

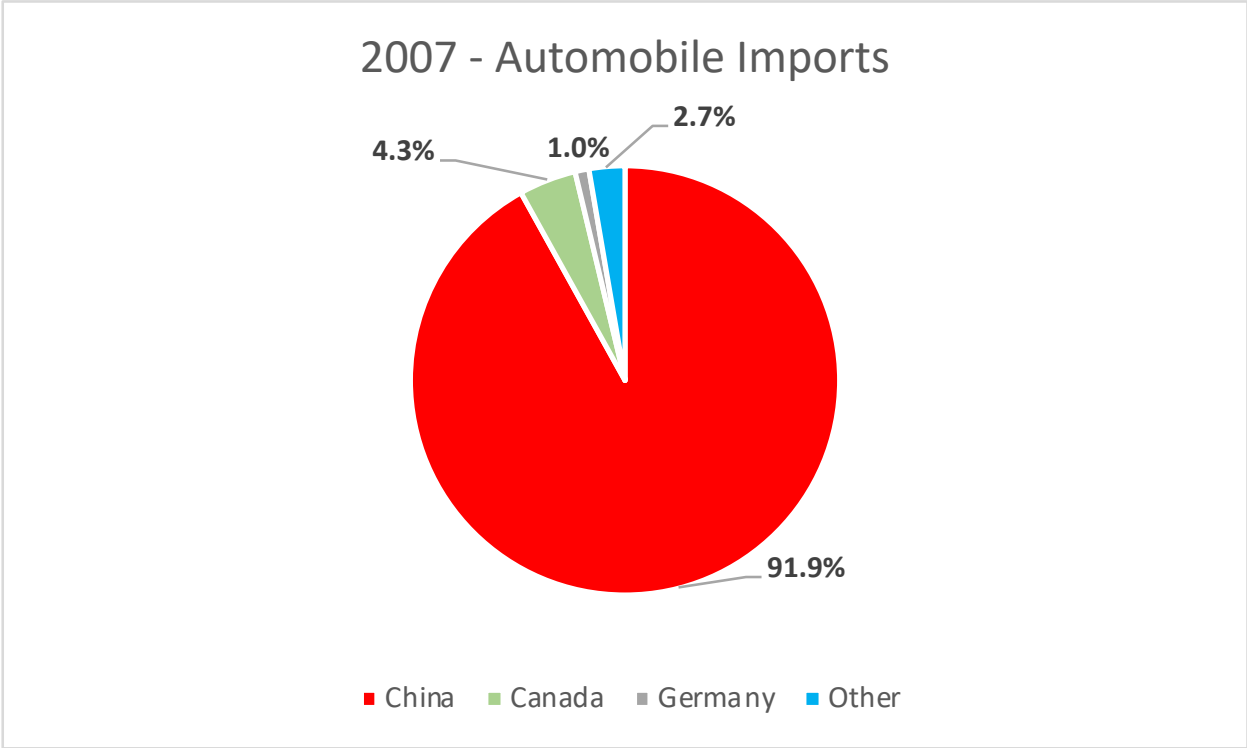

Figure 2b.

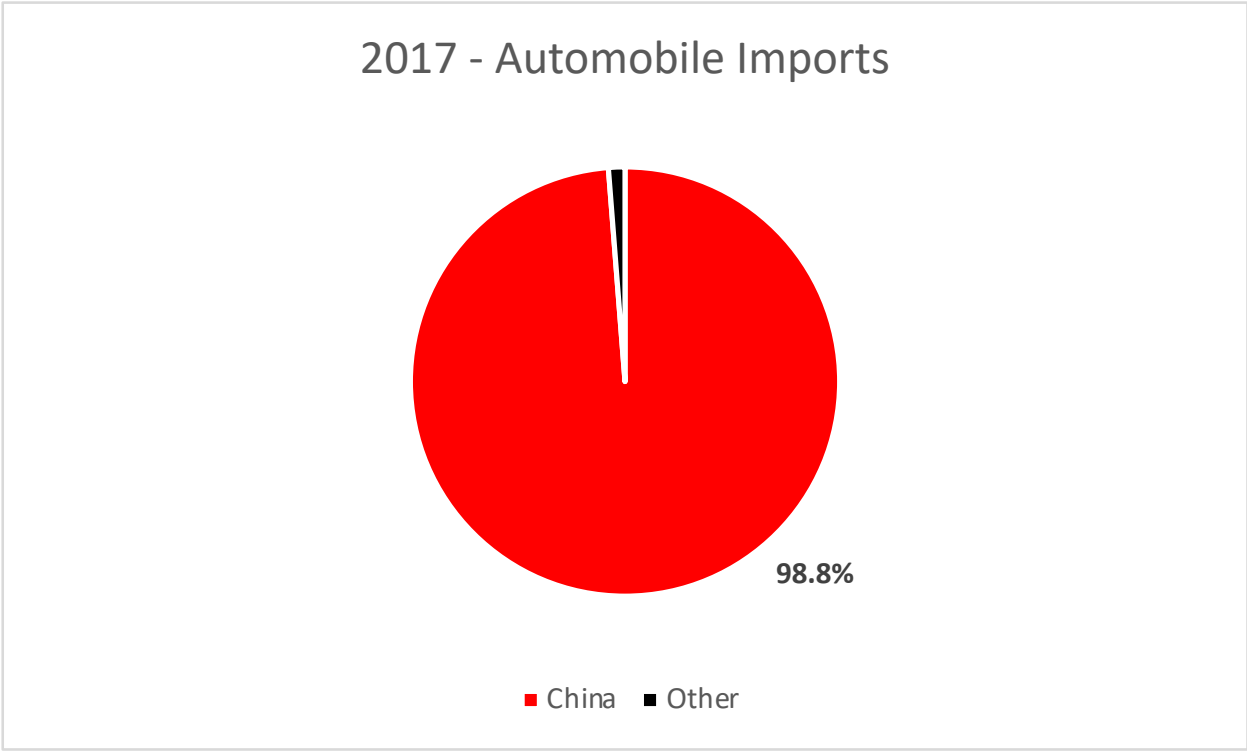

Figure 2c.

**Coal (3221):**

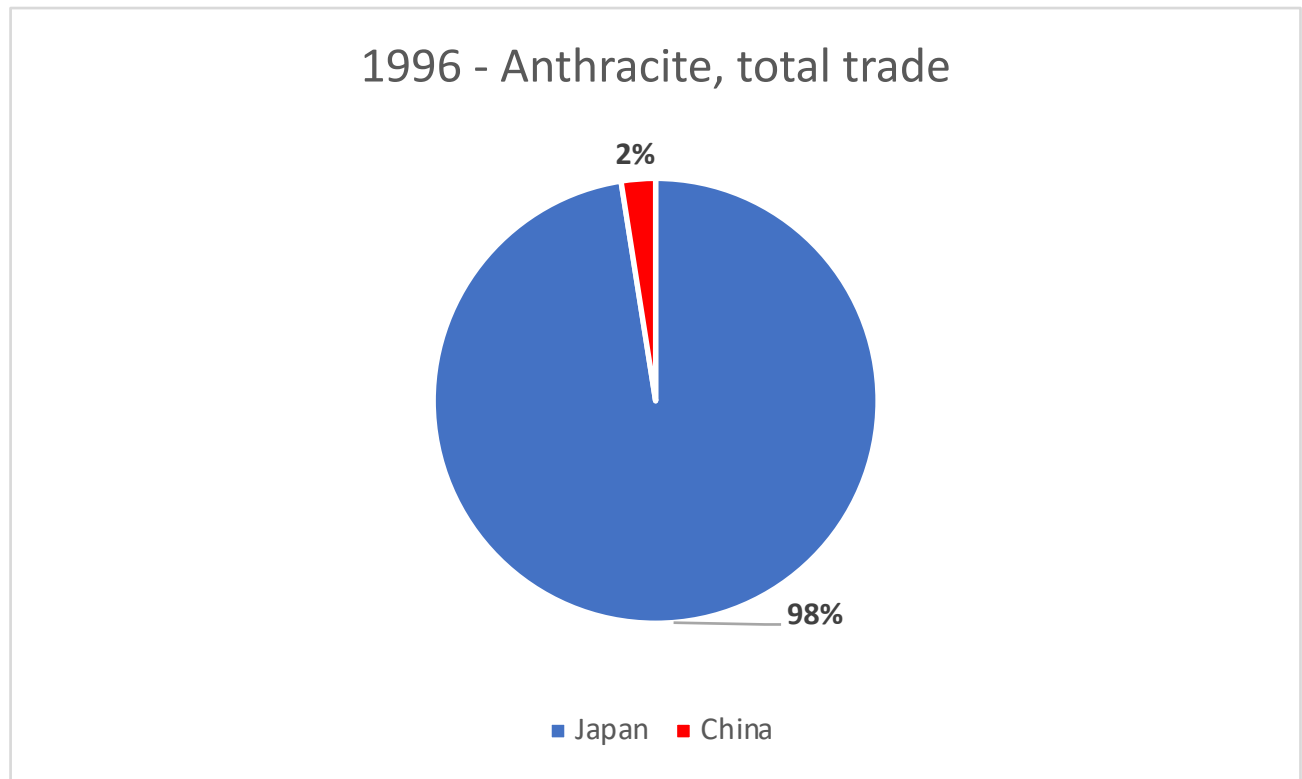

Figure 2d.

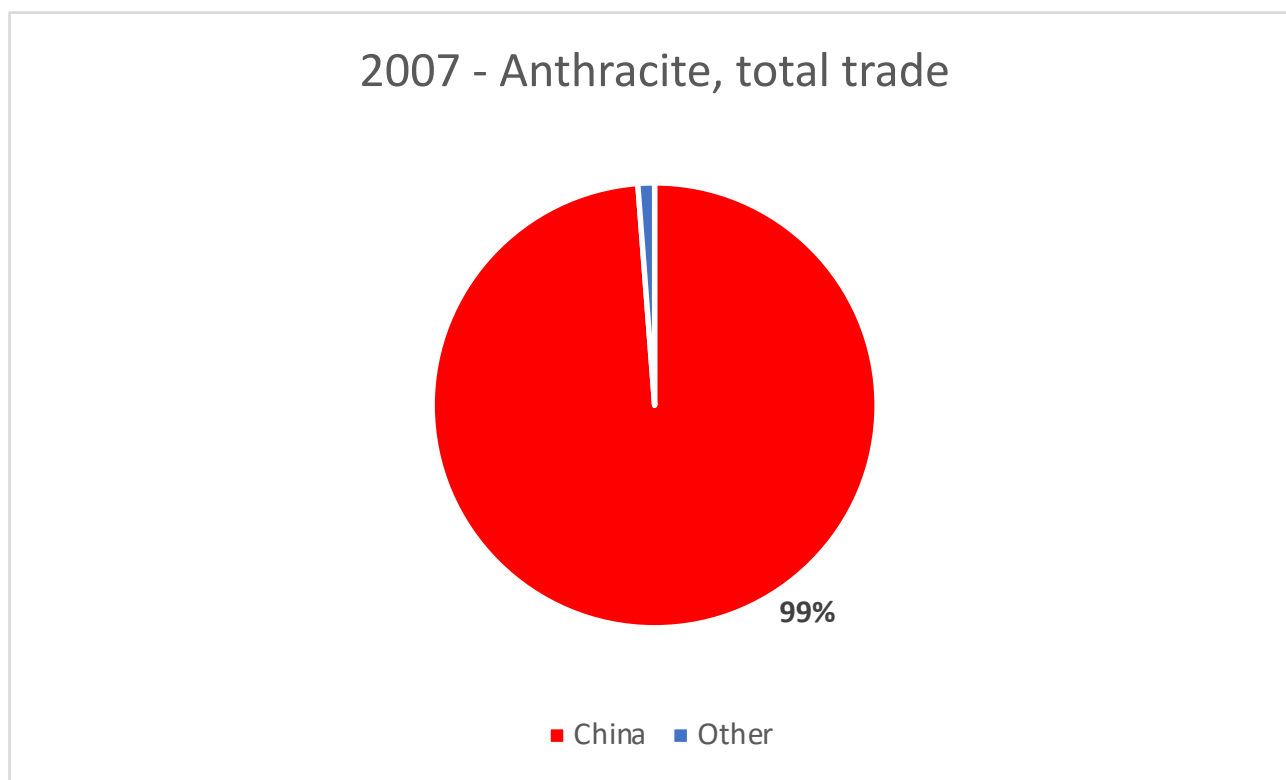

Figure 2e.

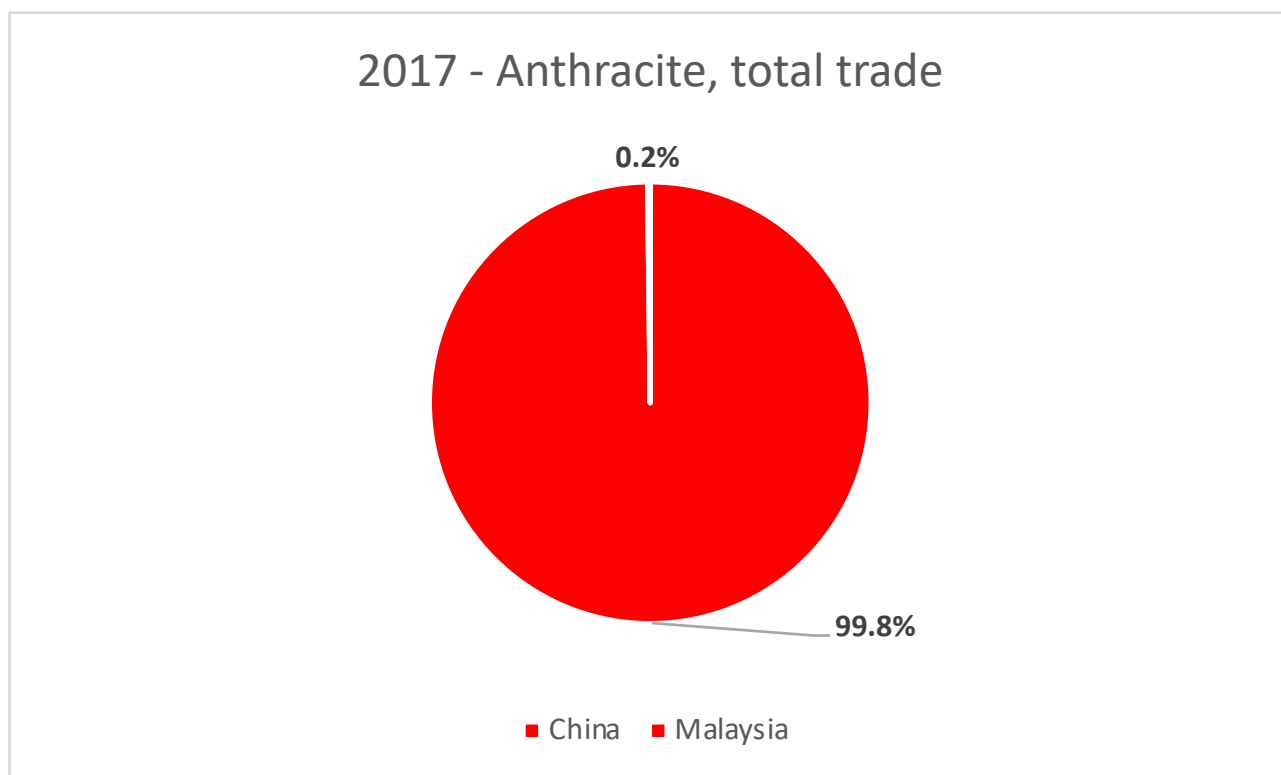

Figure 2f.



**Crustaceans and Fish (0360)**

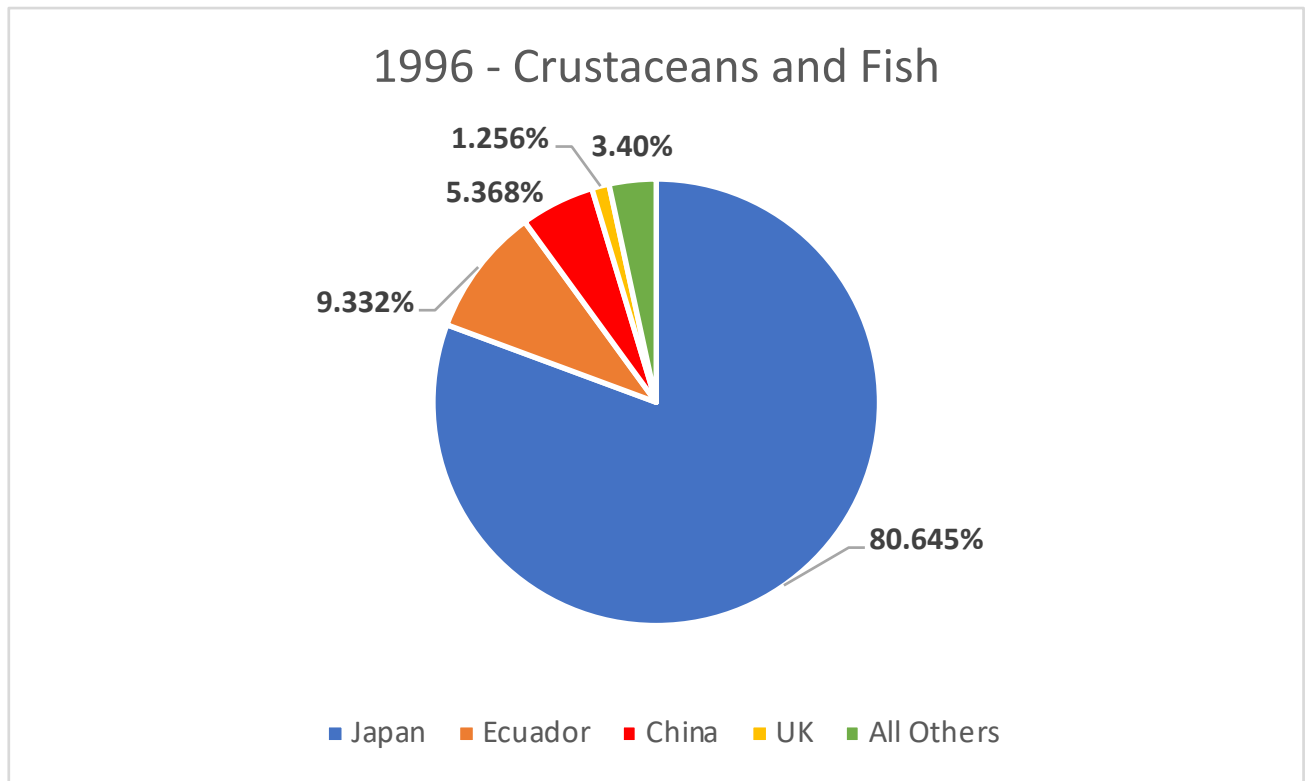

Figure 2g.

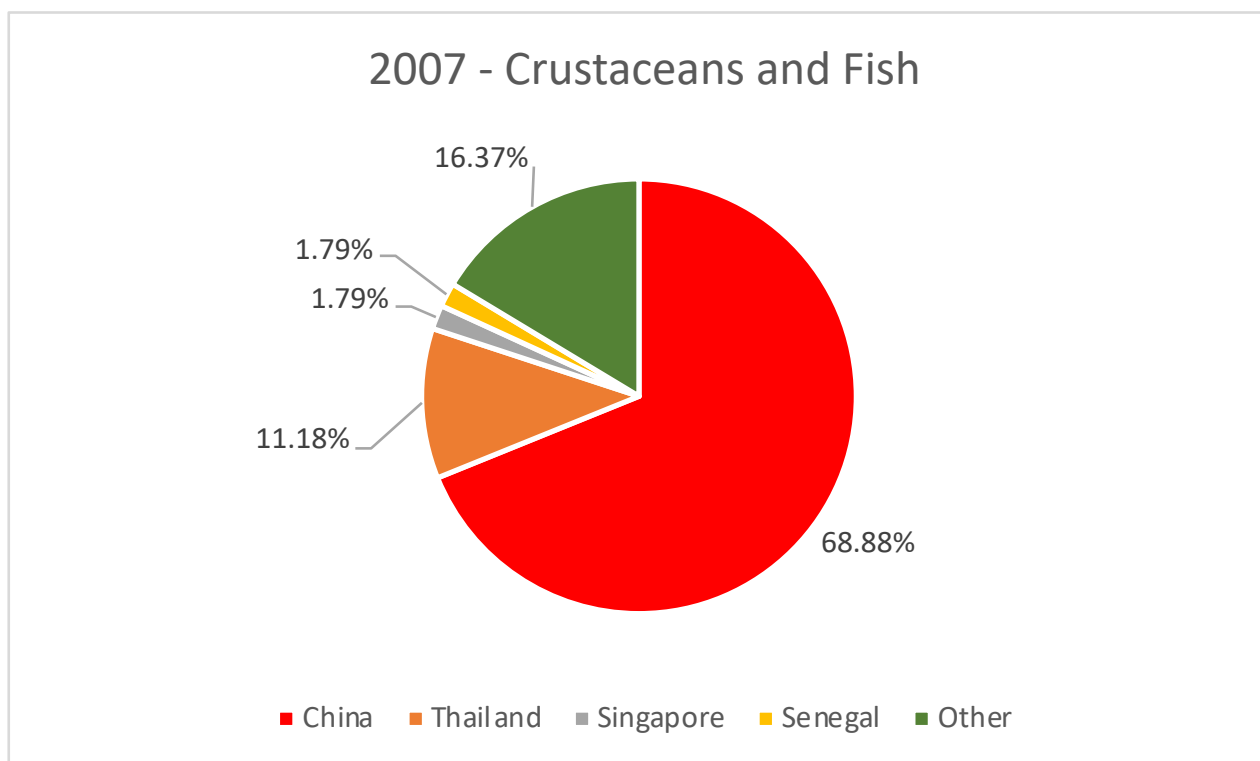

Figure 2h.

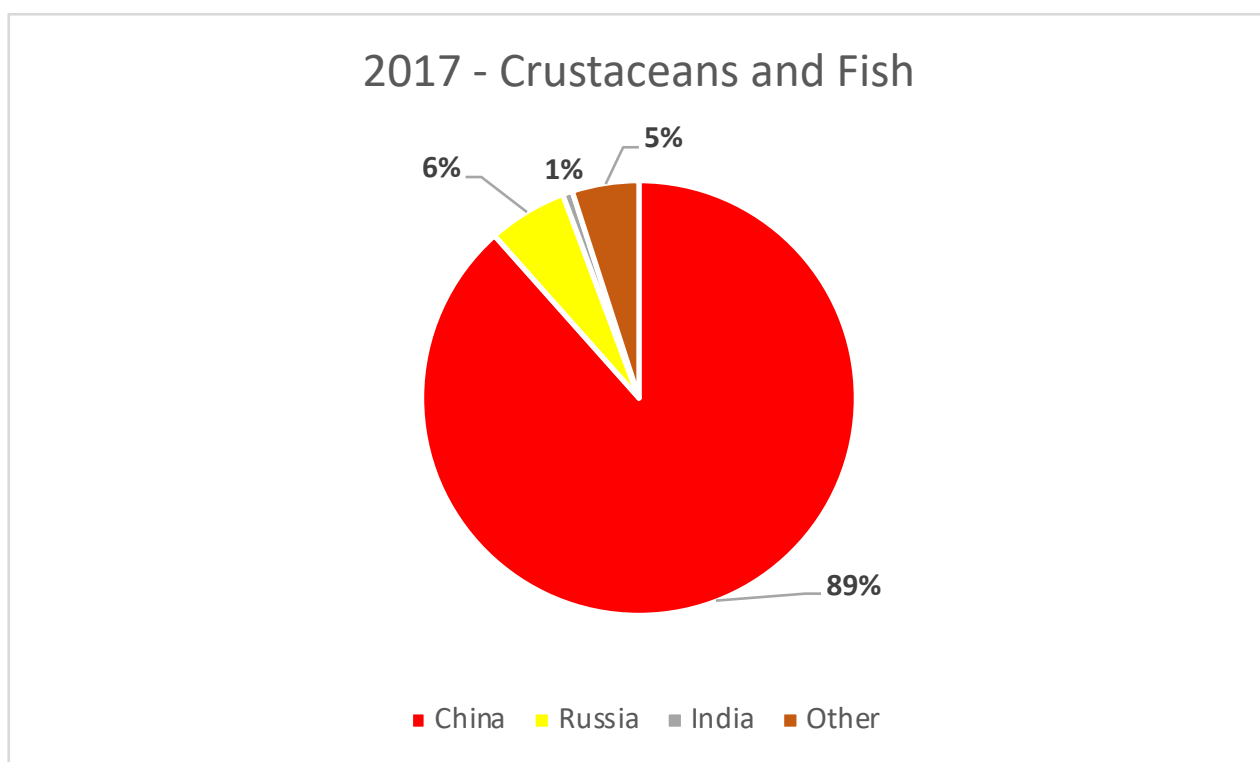

Figure 2i.

## Appendix 3: OLS Regression Results

Supplementary Material

5 February 2024

```
. reg MOSC1 i.diplomacy, robust level(90)
```

|                   |               |   |        |
|-------------------|---------------|---|--------|
| Linear regression | Number of obs | = | 100    |
|                   | F(3, 96)      | = | 2.72   |
|                   | Prob > F      | = | 0.0487 |
|                   | R-squared     | = | 0.0828 |
|                   | Root MSE      | = | 11.194 |

| MOSC1     | Coefficient | Robust<br>std. err. | t     | P> t  | [90% conf. interval] |           |
|-----------|-------------|---------------------|-------|-------|----------------------|-----------|
| diplomacy |             |                     |       |       |                      |           |
| 1         | -2.110005   | 1.870549            | -1.13 | 0.262 | -5.216765            | .996756   |
| 2         | -2.784278   | 1.406967            | -1.98 | 0.051 | -5.121083            | -.4474723 |
| 3         | 5.851214    | 4.353135            | 1.34  | 0.182 | -1.378827            | 13.08125  |
| _cons     | 4.152245    | 1.358713            | 3.06  | 0.003 | 1.895584             | 6.408906  |

Marginal Effects (Adjusted Predictions) of our independent variable *Diplomacy* with 95% confidence intervals:

|                      |                     |
|----------------------|---------------------|
| Adjusted predictions | Number of obs = 100 |
| Model VCE: Robust    |                     |

Expression: Linear prediction, predict()

|           | Delta-method |           |      |       | [95% conf. interval] |          |
|-----------|--------------|-----------|------|-------|----------------------|----------|
|           | Margin       | std. err. | t    | P> t  |                      |          |
| diplomacy |              |           |      |       |                      |          |
| 0         | 4.152245     | 1.358713  | 3.06 | 0.003 | 1.455221             | 6.849268 |
| 1         | 2.04224      | 1.285634  | 1.59 | 0.115 | -.5097225            | 4.594203 |
| 2         | 1.367967     | .365316   | 3.74 | 0.000 | .6428201             | 2.093113 |
| 3         | 10.00346     | 4.135659  | 2.42 | 0.017 | 1.794239             | 18.21268 |

The marginal effects are plotted in the paper – see Figure 2.
